# Supplementary material for: Global Down-regulation of Gene Expression Induced by Mouse Mammary Tumor Virus (MMTV) in Normal Mammary Epithelial Cells
Source: MDPI journal article supplement (doi:10.3390/v15051110), 2023-05-02
Supplement: s1 [file s1]

## Supplementary Figures S1-S4

# Global Downregulation of Gene Expression Induced by Mouse Mammary Tumor Virus (MMTV) in Normal Mammary Epithelial Cells

Waqar Ahmad<sup>1‡</sup>, Neena G. Panicker<sup>1‡</sup>, Shaima Akhlaq<sup>1</sup>, Bushra Gull<sup>1</sup>,  
Jasmin Baby<sup>1</sup>, Thanumol A. Khader<sup>1</sup>, Tahir A. Rizvi<sup>2,3,4</sup> and Farah  
Mustafa<sup>1,3\*</sup>

Figure S1

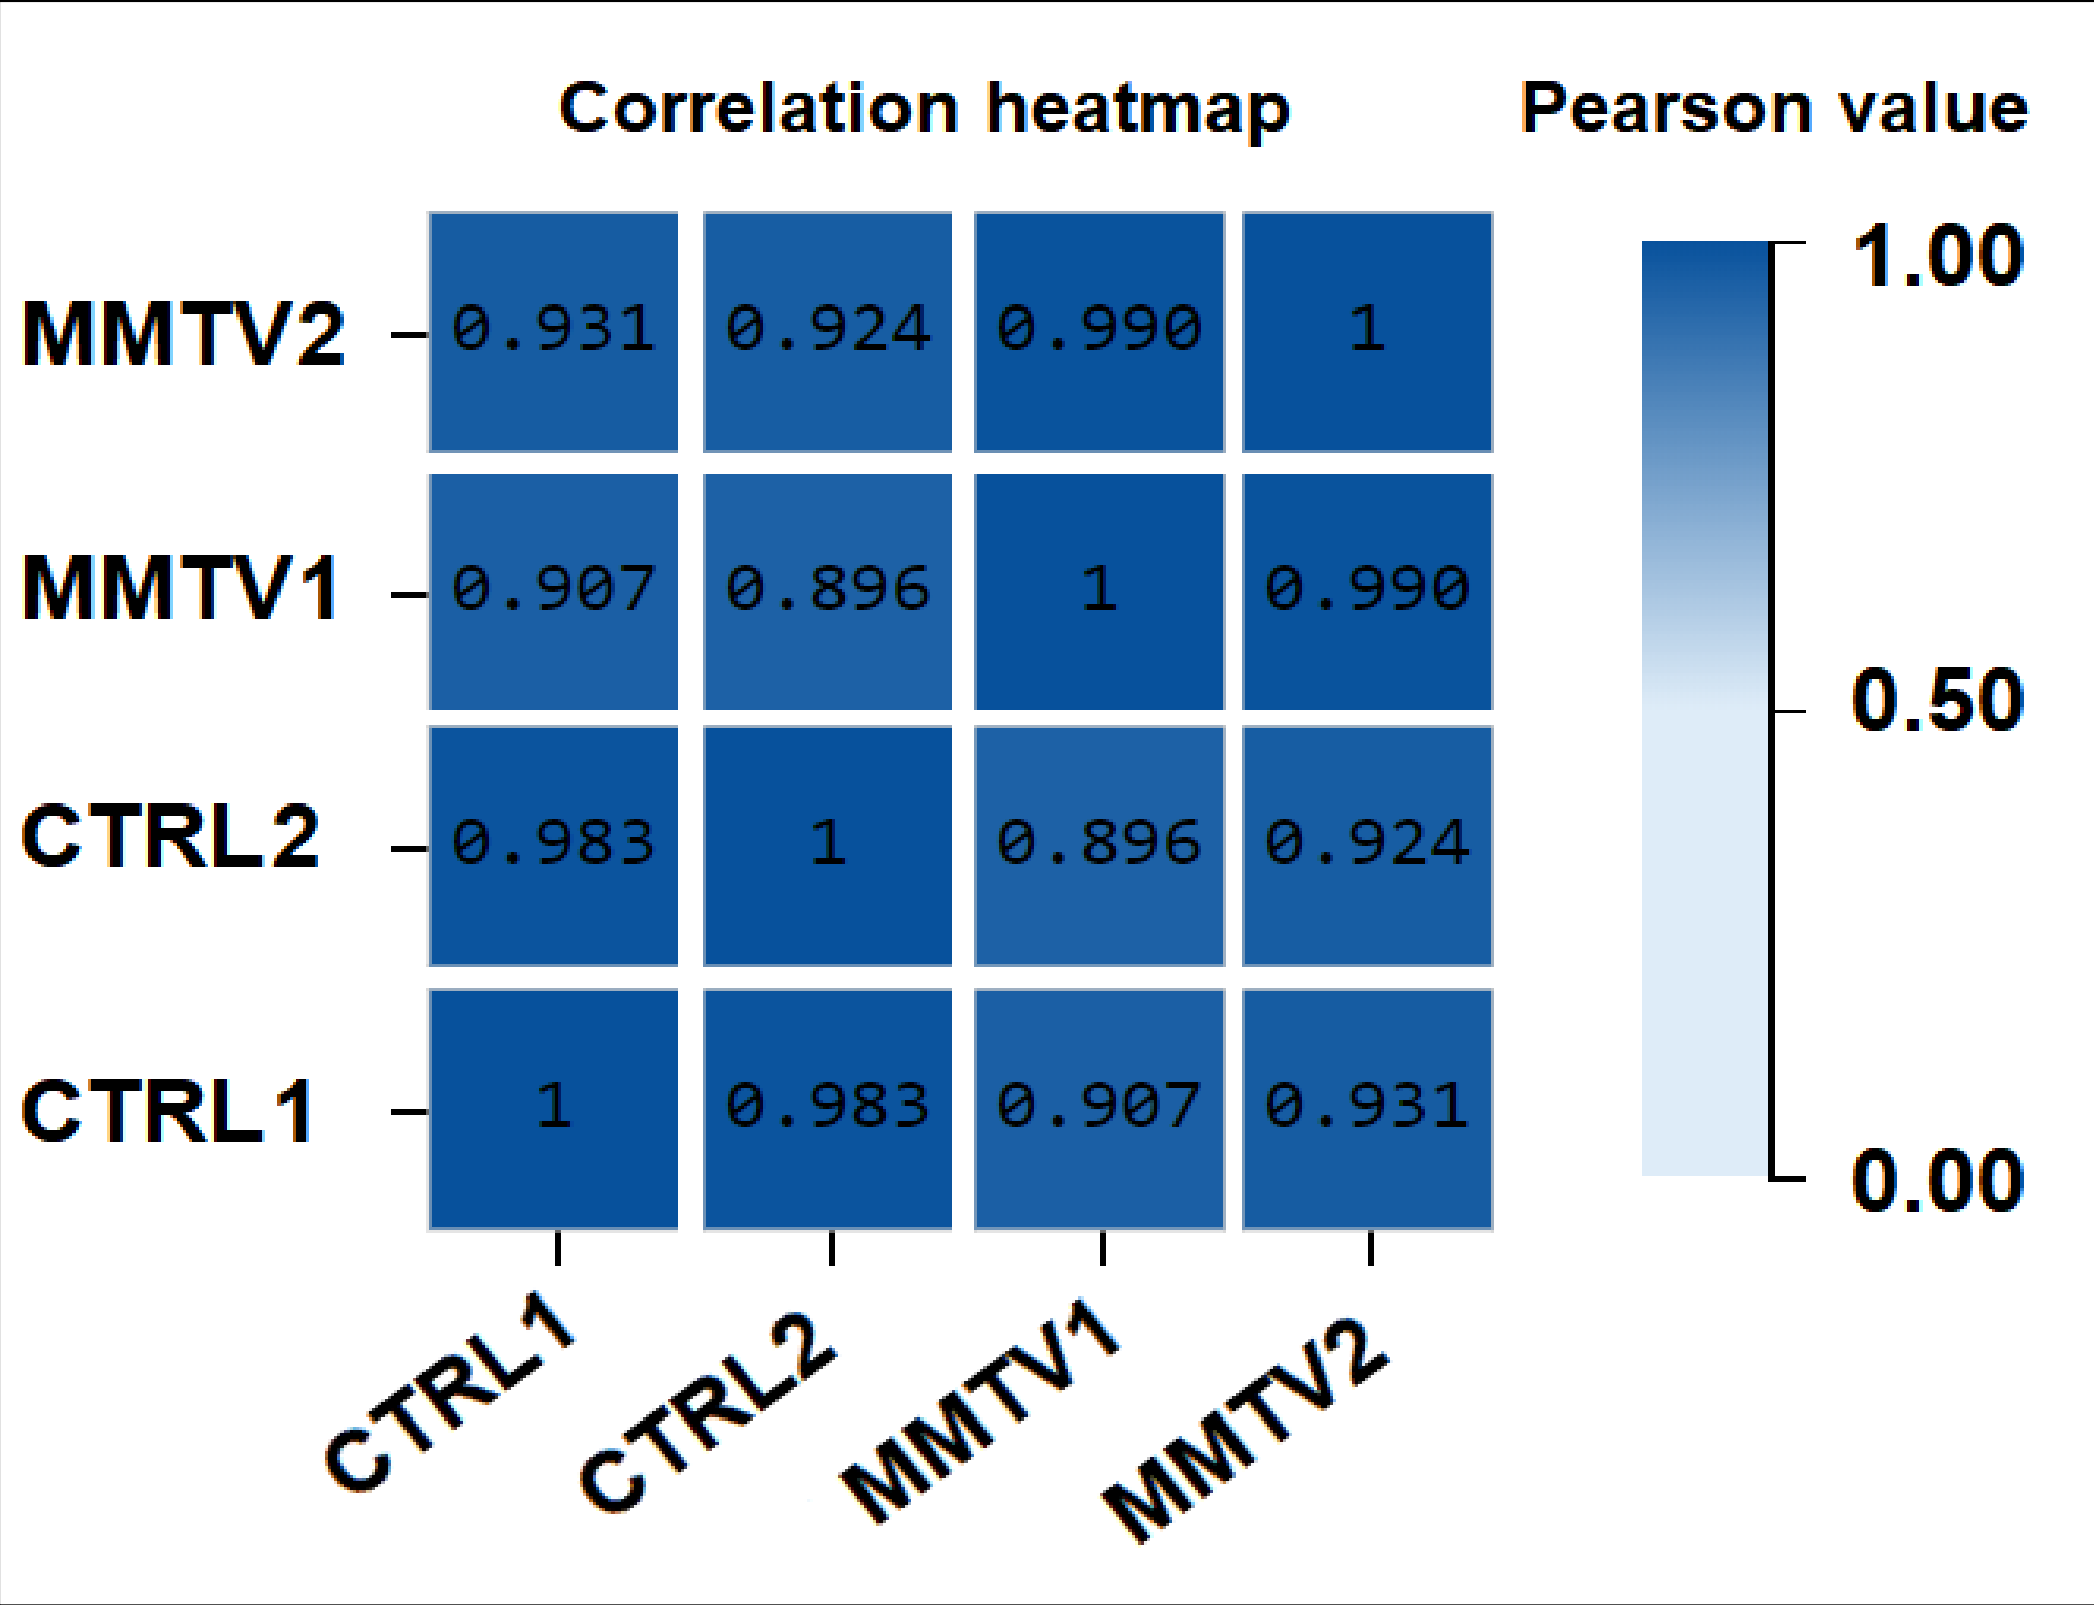

**Figure S1: Pearson correlation graph of four samples sequenced in this study.** The X and Y axes represent each sample. Color represents the correlation coefficient (darker colors represent higher correlations whereas lighter colors represent lower correlations.)

**Figure S2**

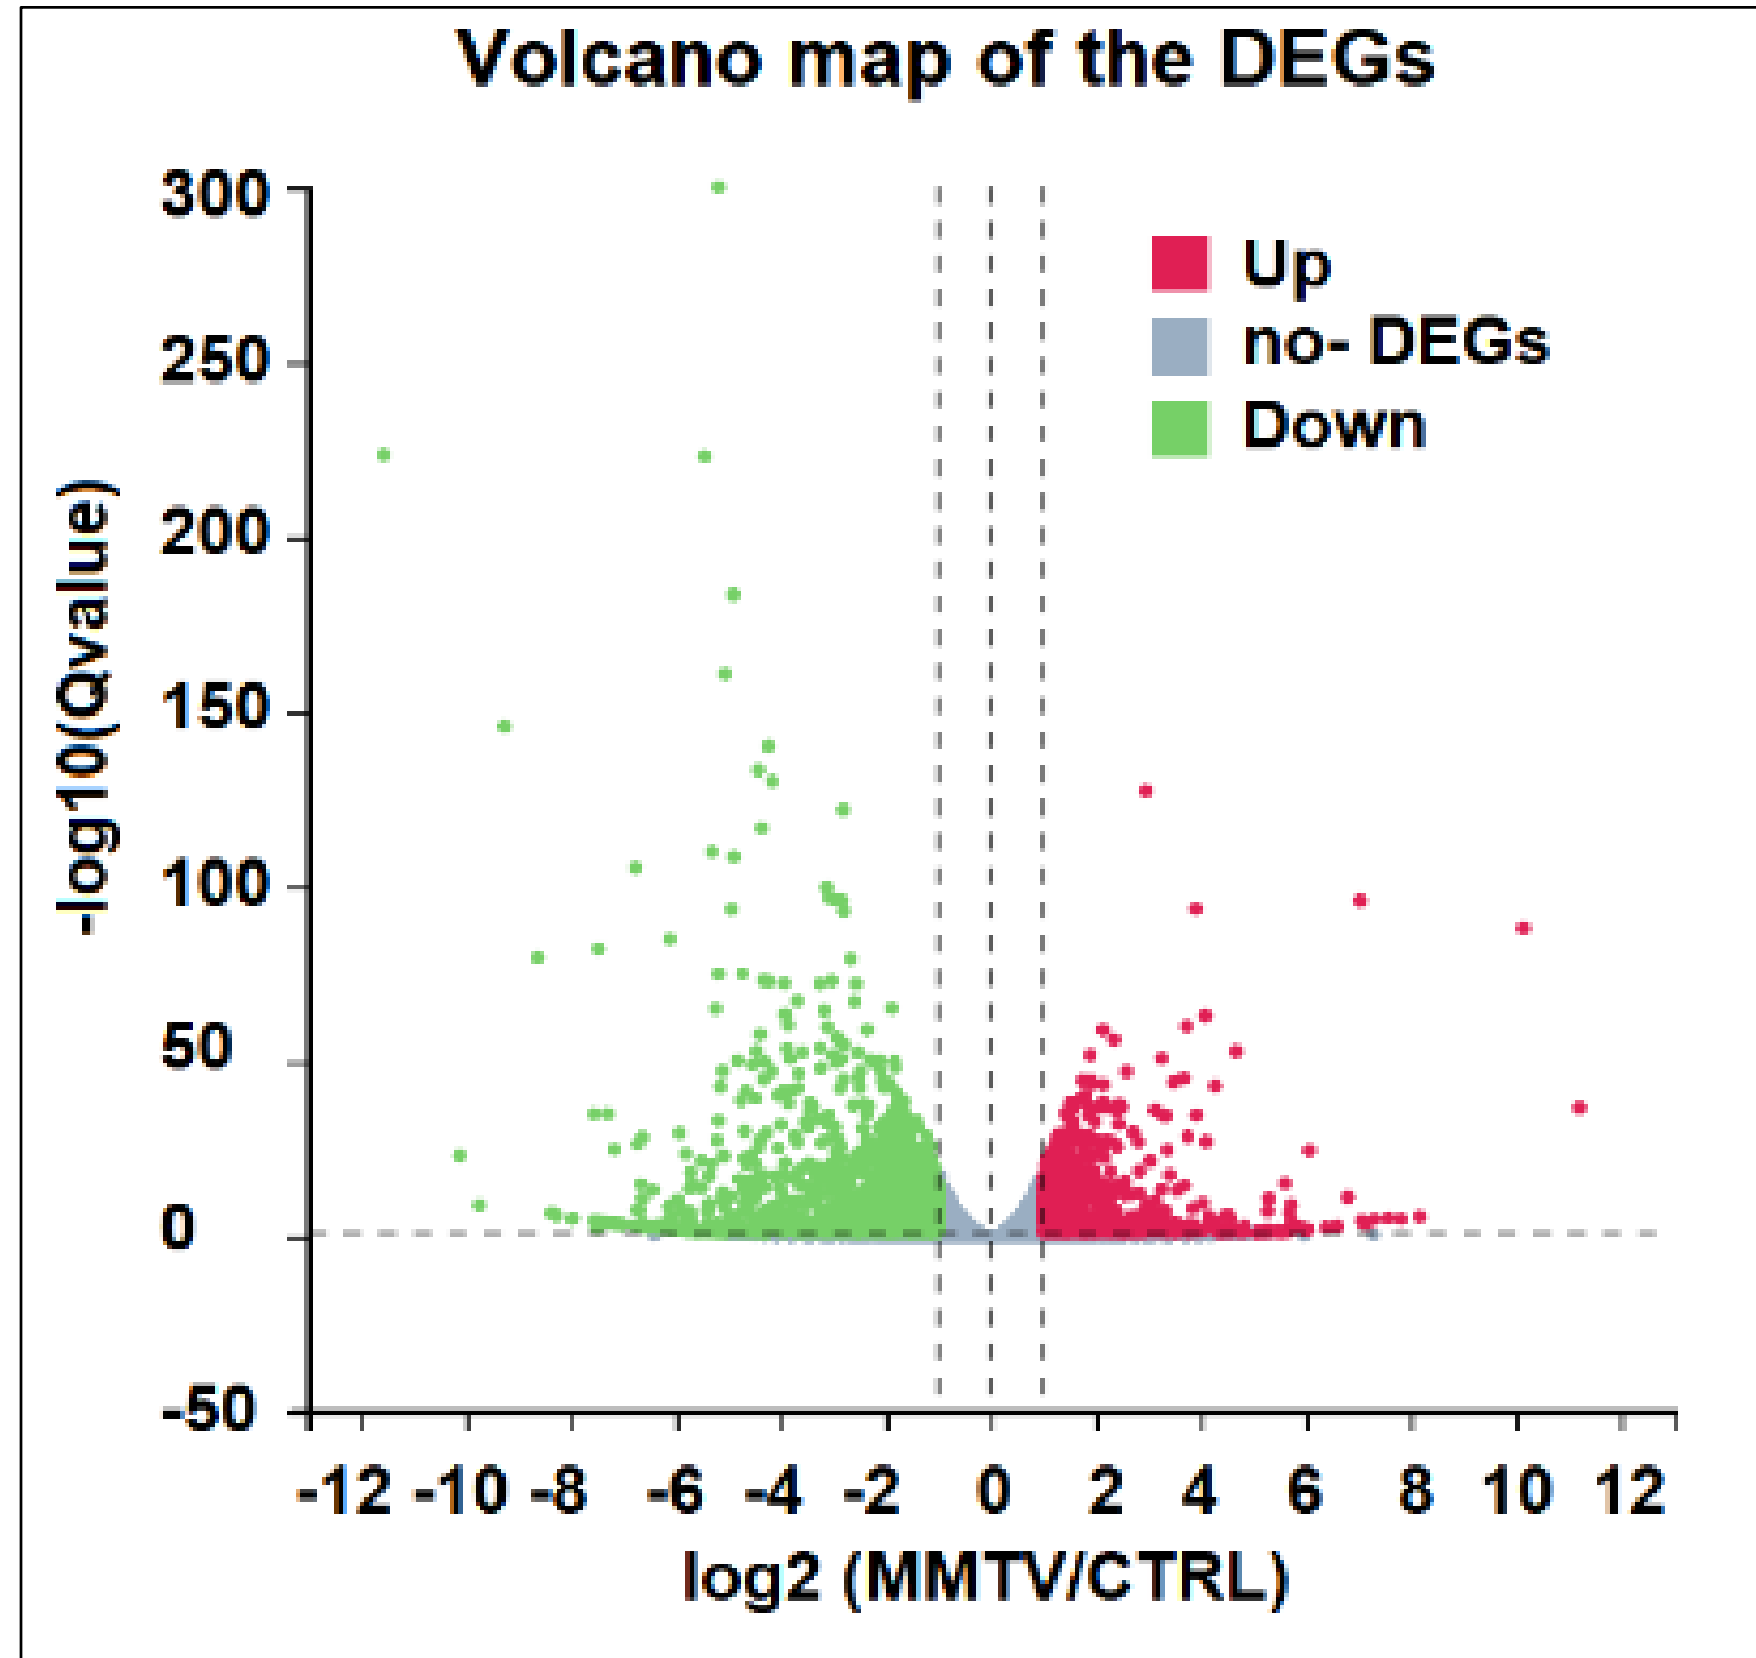

**Figure S2: The volcano plot of all DEGs in MMTV/CTRL group.** The X- axis represents the fold change of the difference after conversion to  $\log_2$ , and the Y-axis represents the significance value after conversion to  $\log_{10}$ . Red color represents up regulated DEGs, green represent down regulated DEGs while gray represents no-DEGs.

Figure S3

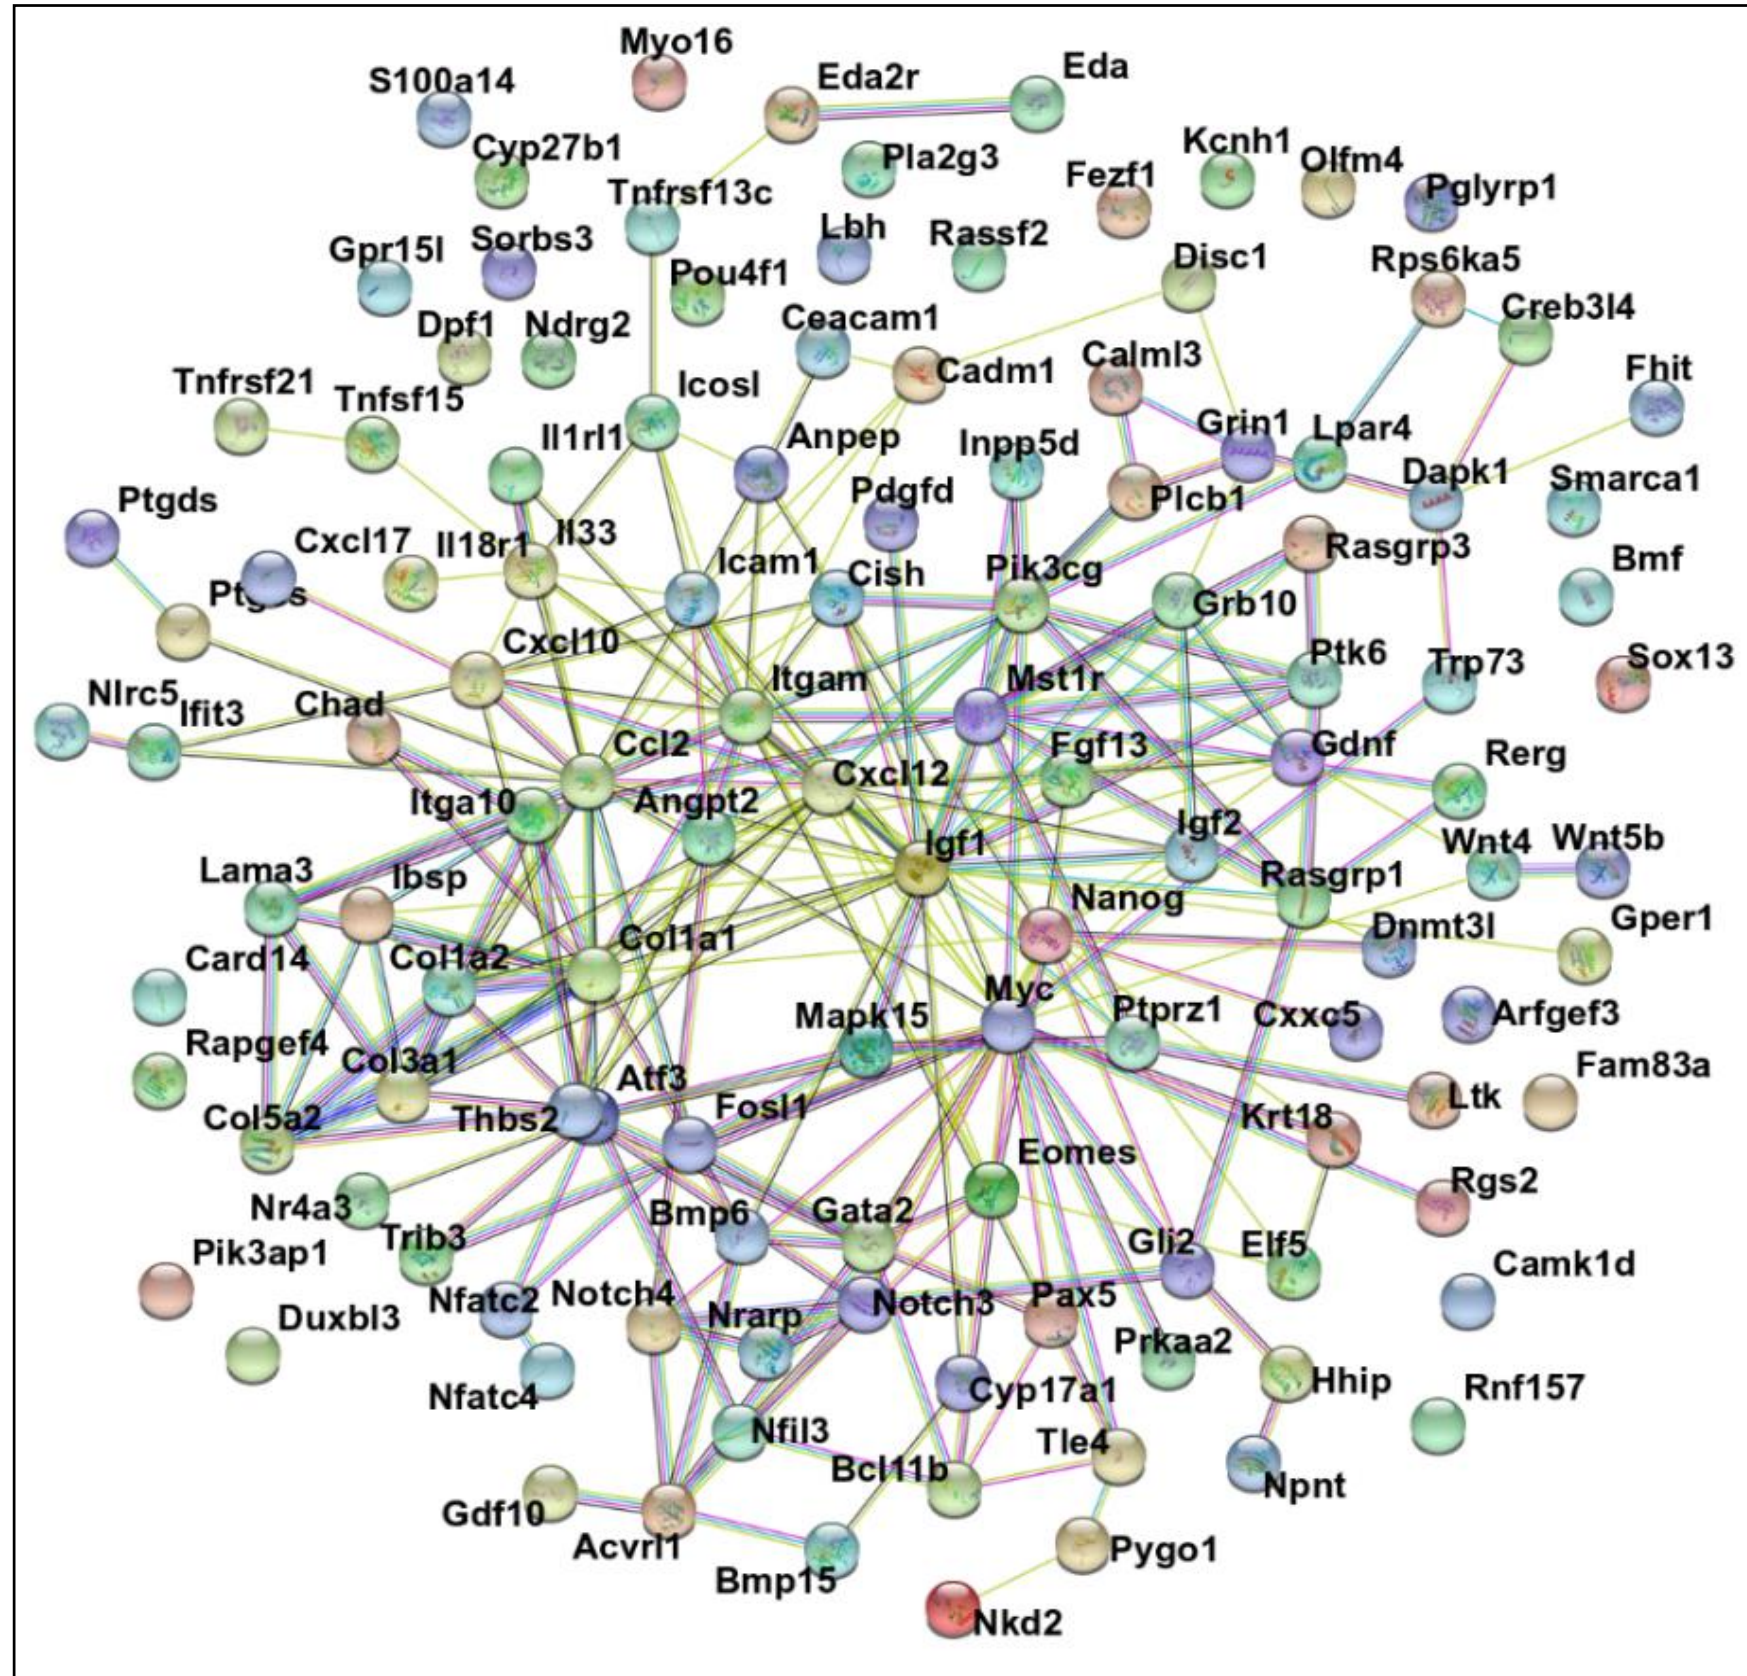

**Figure S3:** The protein-protein interaction (PPI) network for 122 DEGs present in five or more pathways. STRING was used to generate this network.

Figure S4

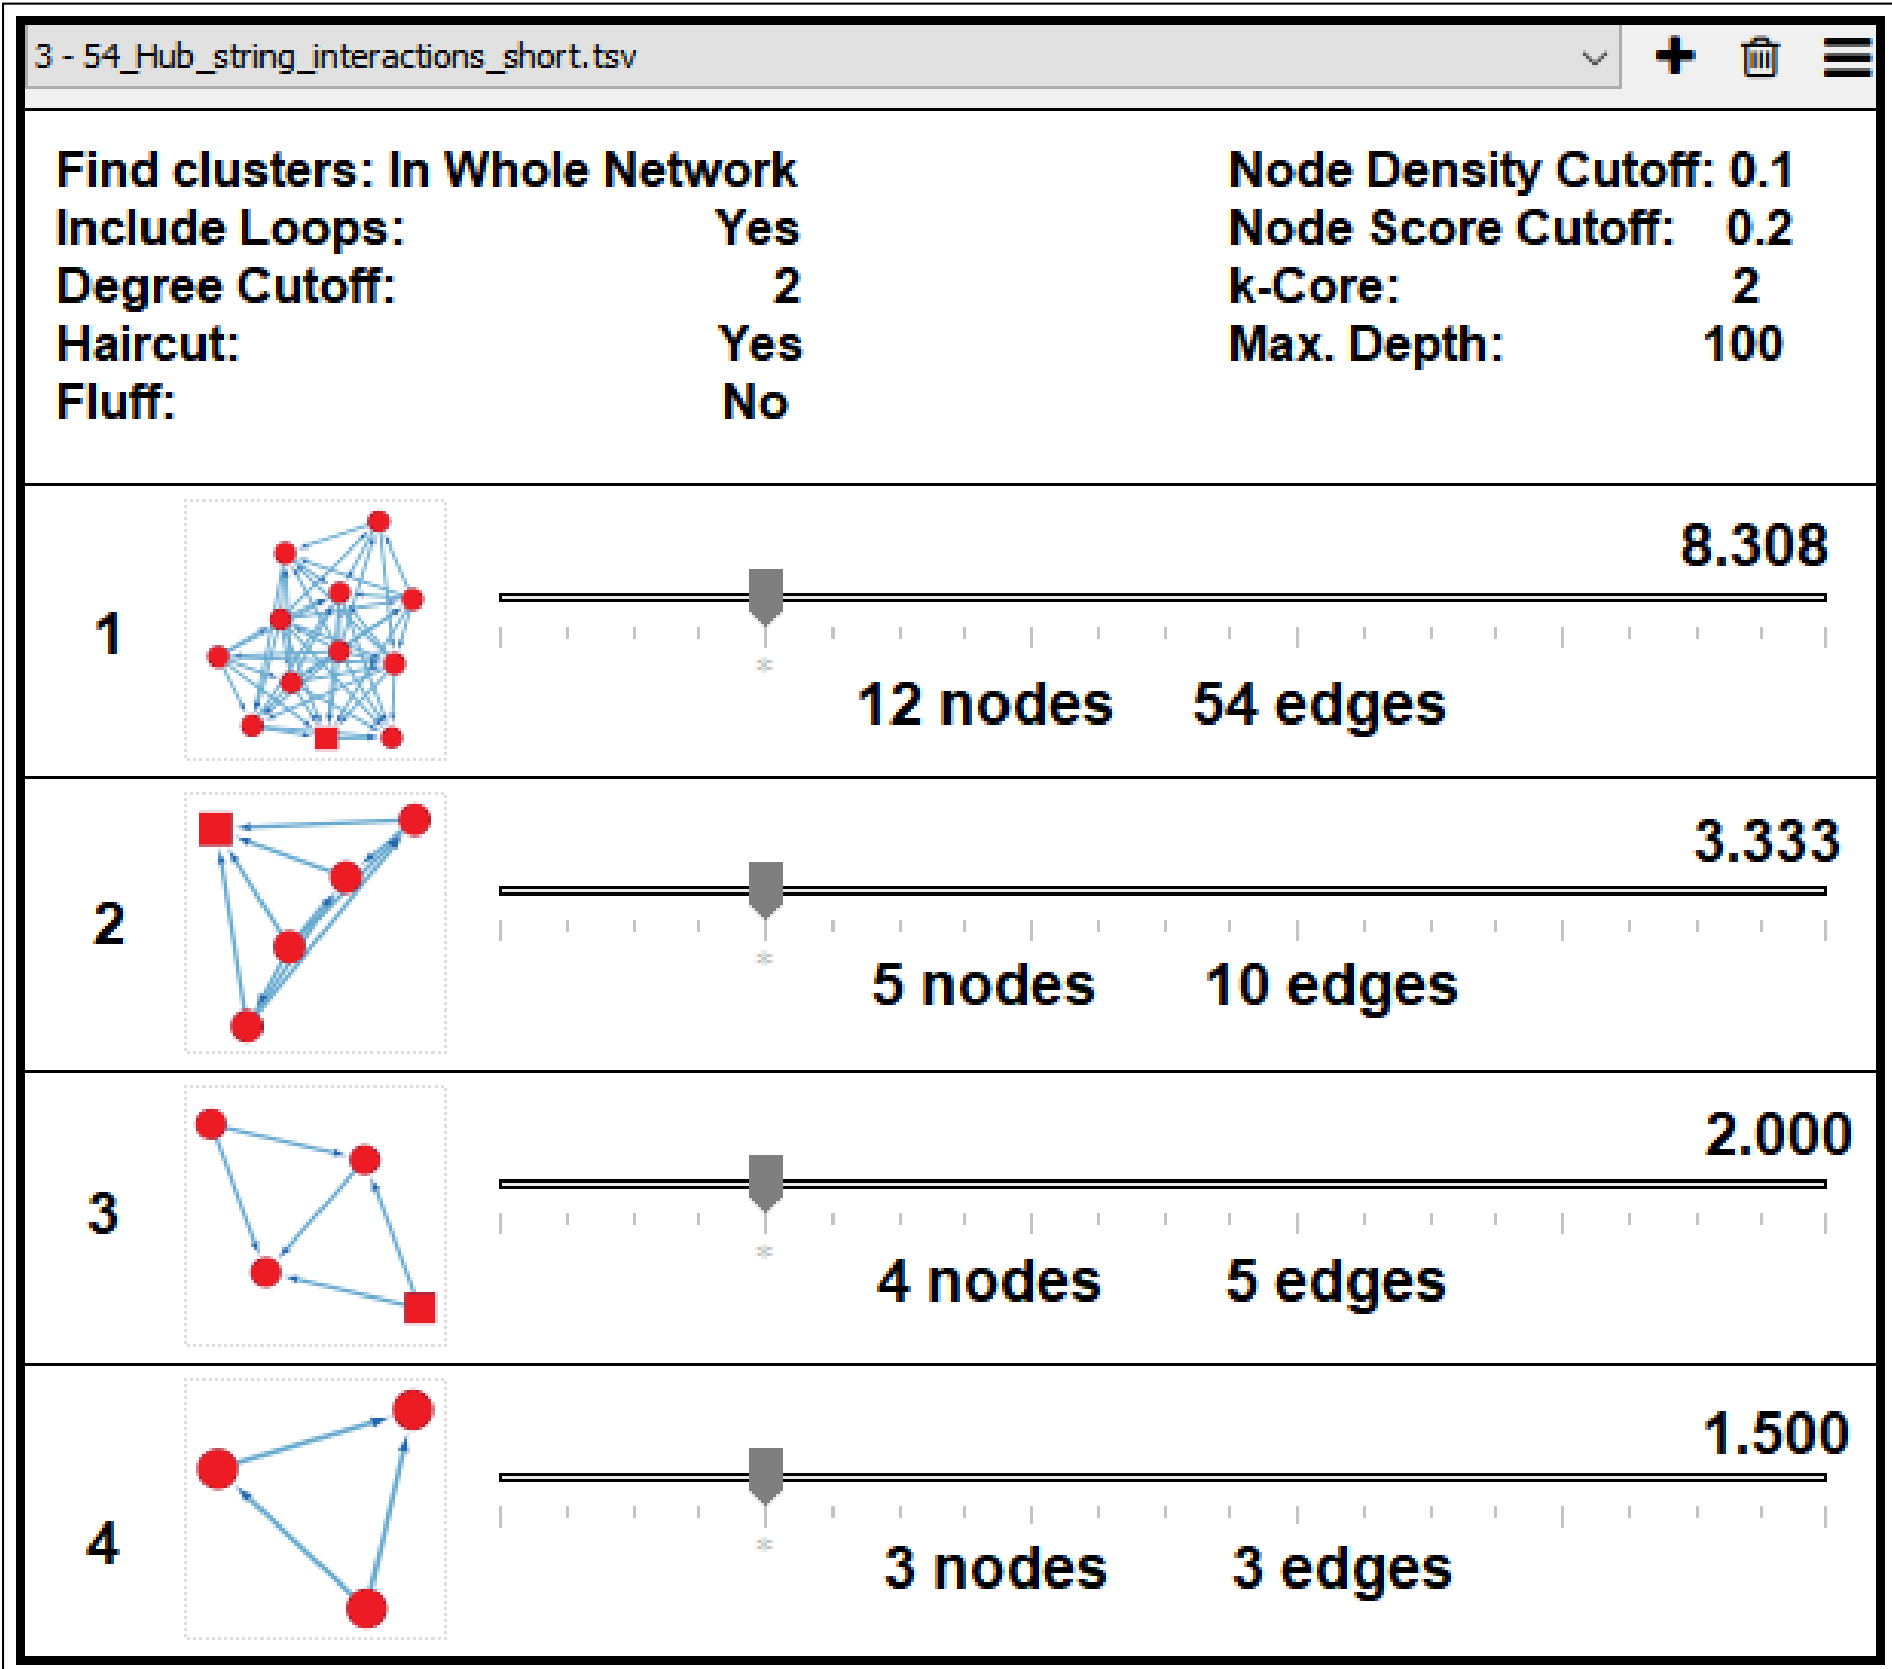

**Figure S4:** Screenshot of the modules produced after using MCODE. The module with best score was chosen as hub genes.
